# Supplementary material for: Functional foregut anatomy of the blue–green sharpshooter illustrated using a 3D model
Source: PubMed Central journal article supplement (PMC7985137; doi:10.1038/s41598-021-85954-4), 2021-03-22

# Interactive 3D Figures

## Functional Foregut Anatomy of the Blue-green Sharpshooter Illustrated Using a 3D Model

This supporting material contains interactive 3D versions of Figs. 1, 2, and 3. It may take around a minute for each subfigure to activate after clicking on it and giving permission to view content. If there is trouble viewing the details of the model, try changing the lighting.

**Fig. 1a**

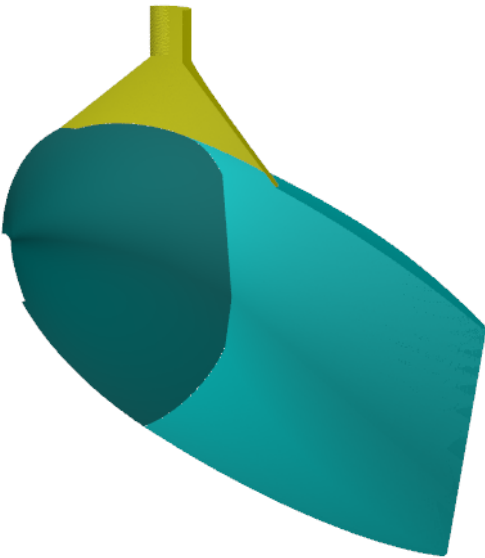

**Fig. 1b**

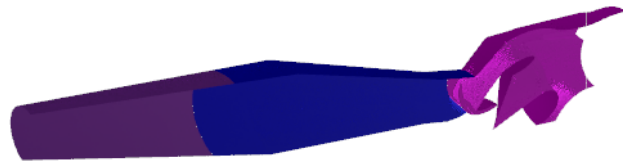

**Fig. 1c**

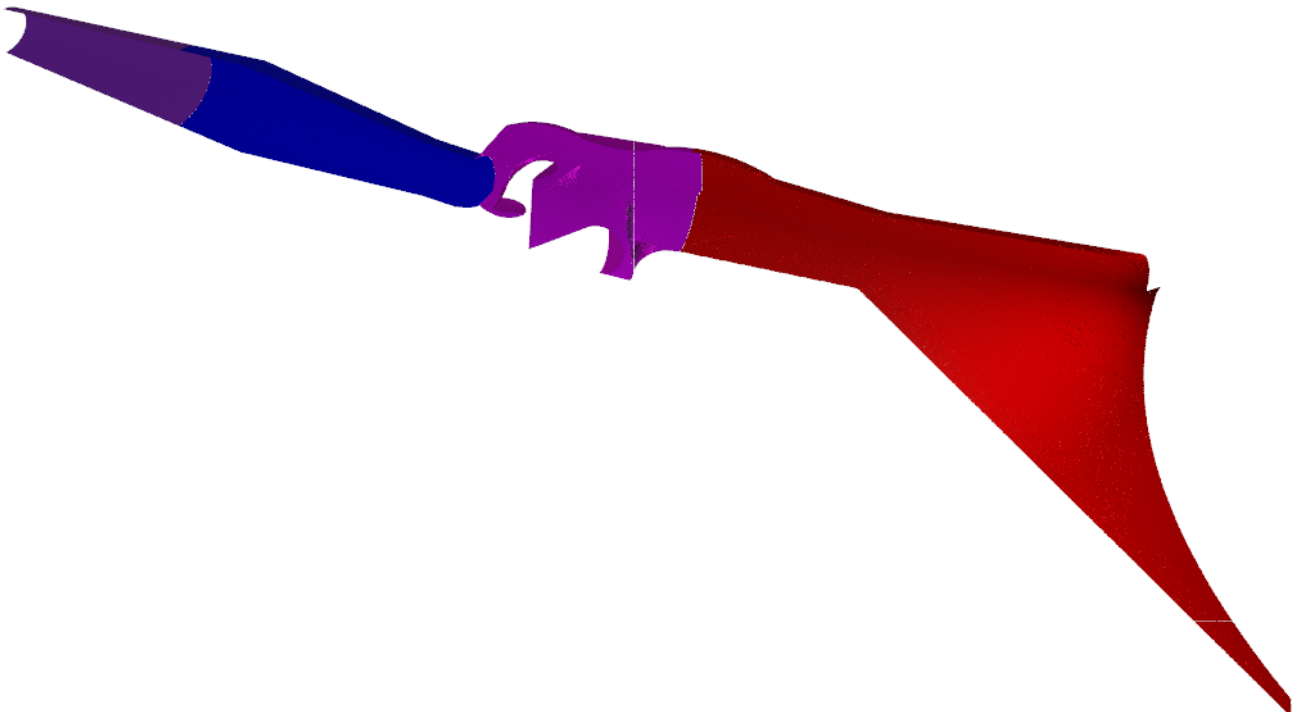

Fig. 2a

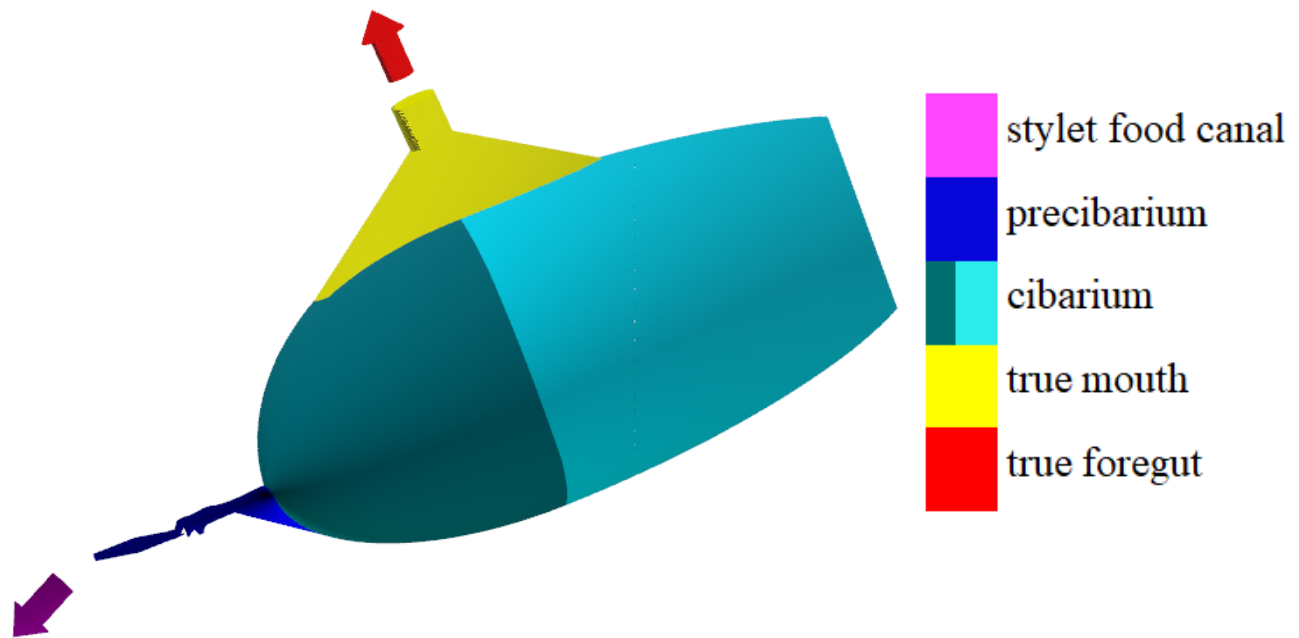

Fig. 2b

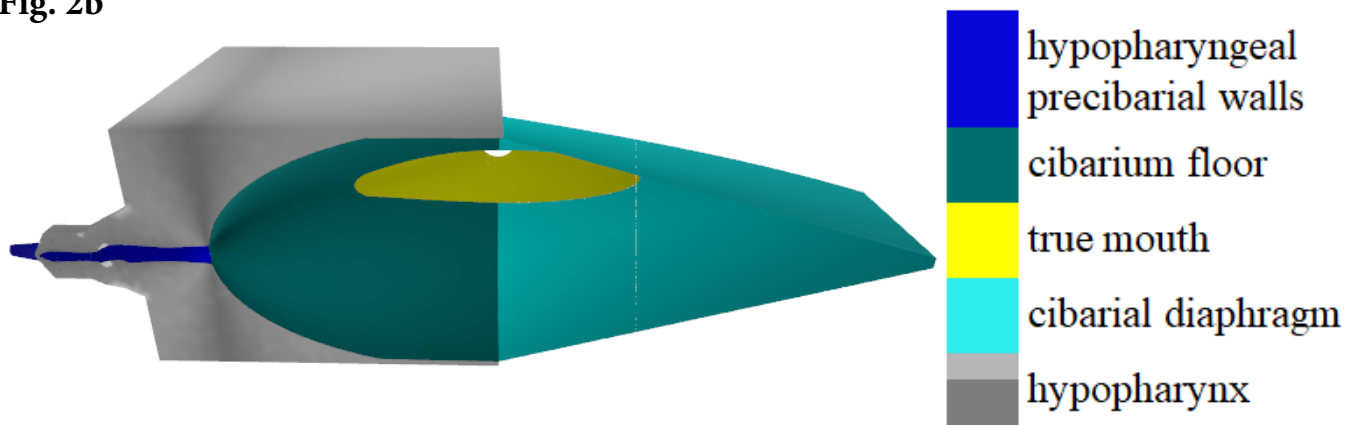

Fig. 2c

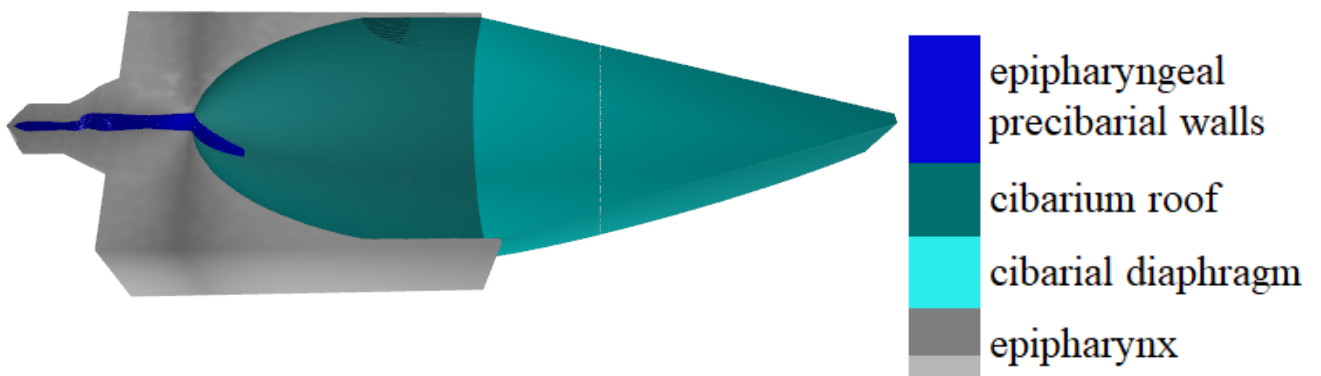

Fig. 3a

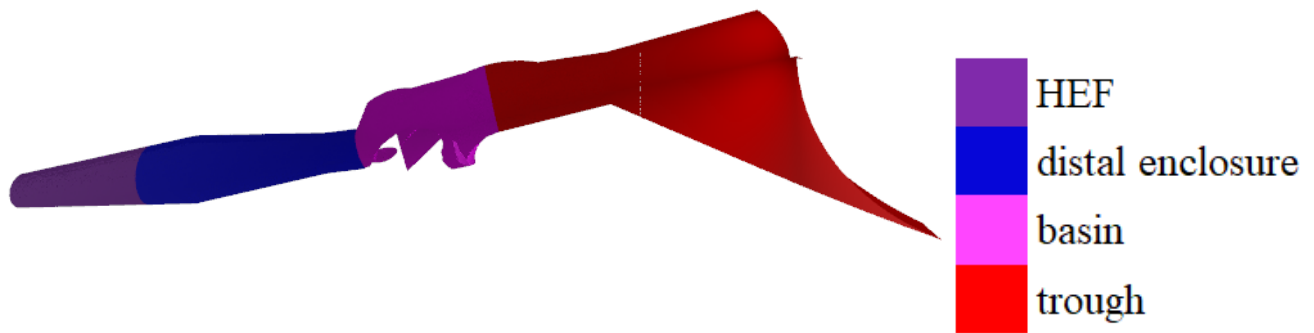

Fig. 3b

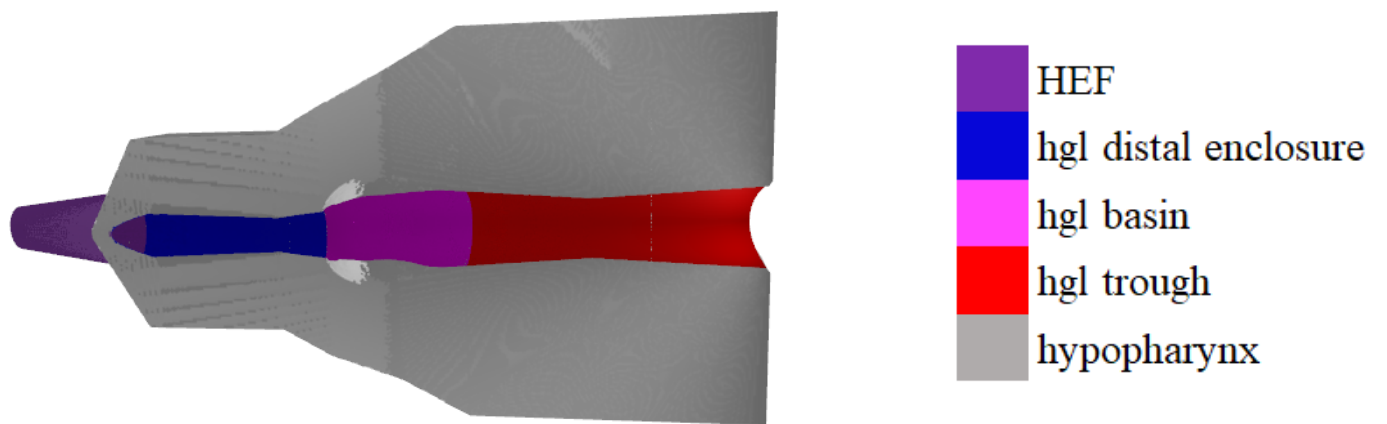

Fig. 3c

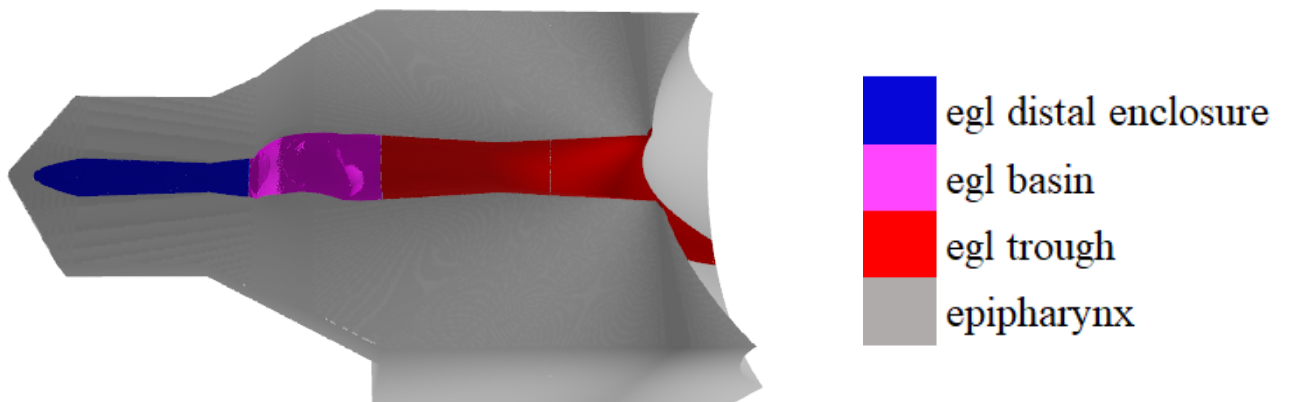

Supplement: 41598_2021_85954_MOESM1_ESM.pdf [file 41598_2021_85954_MOESM1_ESM.pdf]
